# Supplementary material
Source: PubMed Central journal article supplement (PMC2393766)
Supplement: pnas_0708921105_1.pdf [file pnas_0708921105_1.pdf]

Sugar Maple Lower

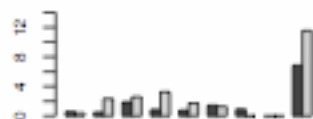

American Beech Lower

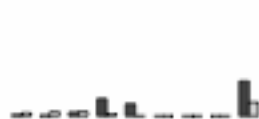

Yellow Birch Lower

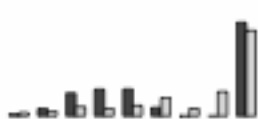

Sugar Maple Upper

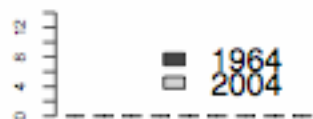

American Beech Upper

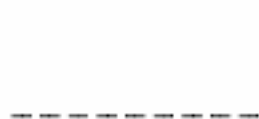

Yellow Birch Upper

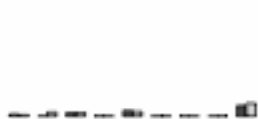BA (m<sup>2</sup>/ha)

Red Spruce Lower

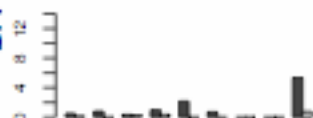

Balsam Fir Lower

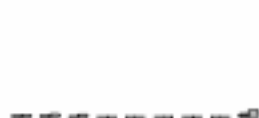

Paper Birch Lower

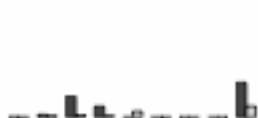

Red Spruce Upper

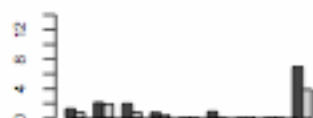

Balsam Fir Upper

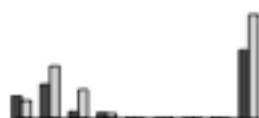

Paper Birch Upper

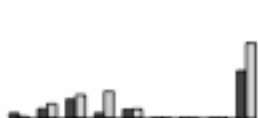

Size class (cm)
