# Supplementary material
Source: PubMed Central journal article supplement (PMC2393766)
Supplement: pnas_0708921105_2.pdf [file pnas_0708921105_2.pdf]

Sugar Maple Lower

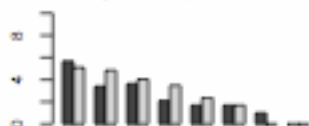

American Beech Lower

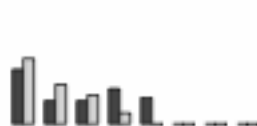

Yellow Birch Lower

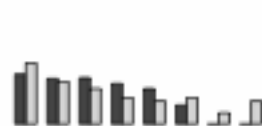

Sugar Maple Upper

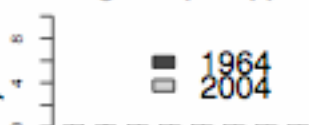

American Beech Upper

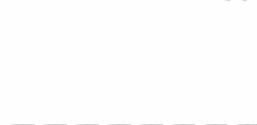

Yellow Birch Upper

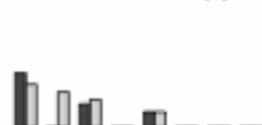

Red Spruce Lower

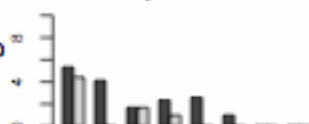

Balsam Fir Lower

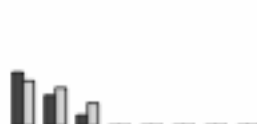

Paper Birch Lower

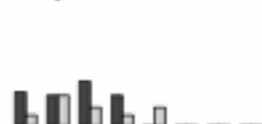

Red Spruce Upper

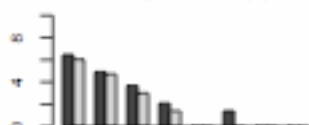

Balsam Fir Upper

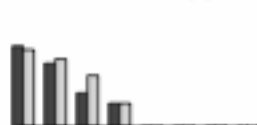

Paper Birch Upper

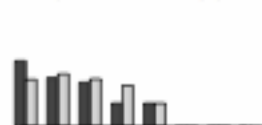

Size class (cm)
